# Supplementary material
Source: PubMed Central journal article supplement (PMC3083616)
Supplement: ejhg2010230x4.pdf [file ejhg2010230x4.pdf]

**Supplementary table 8. Pairwise FST genetic distances between Sagalassos and the populations included in the HVSI/HVS-II (a) HVSI (b) databases.**

Pairwise Fst values are sorted from the lowest to the highest. +:  $p < 0,05$ ; ++: after Bonferroni correction. Abbreviations of populations are as in Supplementary table 3.

| HVSI/HVS-II database |            |    | HVSI database         |            |   |
|----------------------|------------|----|-----------------------|------------|---|
|                      | Sagalassos |    |                       | Sagalassos |   |
| Cam                  | -0,00362   | -  | Bulgaria_Bulgarian    | -0.00013   | - |
| Cri                  | 0,00063    | -  | Turkey_E_Anatolian    | -0.00020   | - |
| SlvW                 | 0,00198    | -  | Turkey_Anatolian      | 0.00317    | - |
| Tur                  | 0,00223    | -  | Croatia_Croatian      | 0.00436    | - |
| Per                  | 0,00244    | -  | Greece_Central_Greek  | 0.00469    | - |
| Bul                  | 0,00313    | -  | Ukrainia_Crimean      | 0.00499    | - |
| CrM                  | 0,0044     | -  | Cyprus_Cyprian        | 0.00511    | - |
| Uyg                  | 0,00483    | -  | Slovakia_Slovakian    | 0.00516    | + |
| UzbU                 | 0,00522    | -  | Jordania_Jordianian   | 0.00525    | + |
| Hun                  | 0,00744    | +  | Italy_Puglia          | 0.00533    | - |
| Irn                  | 0,00842    | -  | Iran_SW_Iranian       | 0.00548    | + |
| Cze                  | 0,00951    | +  | Egypt_Egyptian        | 0.00552    | + |
| Cyp                  | 0,0101     | +  | France_Caux_Bray      | 0.00565    | - |
| Prg                  | 0,01082    | +  | Iran_Iranian          | 0.00577    | + |
| Jor                  | 0,01082    | +  | Turkey_Izmir          | 0.00582    | - |
| Mac                  | 0,01114    | +  | Kurdistan_Kurd        | 0.00583    | + |
| Gre                  | 0,01122    | +  | Turkey_Turk           | 0.00588    | + |
| Taj                  | 0,01127    | +  | Greece_N_Greek        | 0.00603    | + |
| Ita                  | 0,01188    | +  | Balkarian             | 0.00607    | - |
| Spa                  | 0,01193    | +  | Armenia_Armenian      | 0.00611    | + |
| UzbH                 | 0,01202    | -  | Hungary_Hungarian     | 0.00620    | + |
| UzbB                 | 0,01249    | -  | Italy_Italian         | 0.00630    | + |
| Sau                  | 0,01295    | +  | Rutulan               | 0.00632    | - |
| Laz                  | 0,01297    | +  | Turkey_C_Anatolian    | 0.00637    | - |
| SauC                 | 0,01332    | +  | Finland_Finns_Volga   | 0.00643    | - |
| Rsa                  | 0,0136     | +  | Italy_Campania        | 0.00648    | - |
| UzbK                 | 0,01449    | -  | France_Perigord       | 0.00650    | + |
| Pgl                  | 0,01472    | -  | Germany_german        | 0.00667    | + |
| Pol                  | 0,015      | +  | Italy_South_Italian   | 0.00671    | - |
| Drz                  | 0,01558    | +  | Rumania_Rumanian      | 0.00675    | + |
| Slo                  | 0,01569    | +  | Italy_Tuscan          | 0.00677    | + |
| Cux                  | 0,01577    | +  | England_British       | 0.00687    | + |
| Db                   | 0,01611    | +  | Italy_Sicilian        | 0.00698    | + |
| Pld                  | 0,01617    | ++ | Iran_Central_Iranian  | 0.00701    | - |
| SauS                 | 0,01699    | +  | Slovakia_W_Slovaki    | 0.00746    | + |
| Taj2                 | 0,01706    | -  | Moldavia_Moldavian    | 0.00748    | + |
| SauN                 | 0,01781    | +  | Uzbekistan_Uzbek      | 0.00751    | - |
| Kur                  | 0,01889    | +  | Georgia_Georgian      | 0.00752    | + |
| SlvE                 | 0,01959    | +  | France_NWE_French     | 0.00758    | + |
| Rus                  | 0,01962    | +  | Czek_Czek             | 0.00763    | + |
| Abr                  | 0,01989    | +  | Russia_Russian        | 0.00765    | + |
| Fst                  | 0,02007    | +  | Italy_Croatian        | 0.00769    | - |
| Bos                  | 0,02238    | ++ | Italy_Central_Italian | 0.00774    | + |
| KZ                   | 0,02249    | +  | Turkey_Ankara         | 0.00782    | + |
| Var                  | 0,02438    | +  | Kurds                 | 0.00785    | - |
| Tkm                  | 0,02551    | +  | Iran_NW_Iranian       | 0.00808    | + |
| KyrD                 | 0,02558    | +  | Russia_Chechenian     | 0.00817    | - |
| Uzb                  | 0,02603    | ++ | Spain_Spanish         | 0.00822    | + |
| Fin                  | 0,02721    | ++ | Tadjikistan_Tadjik    | 0.00830    | + |
| Bou                  | 0,02866    | +  | Egypt_Arab_Gurna      | 0.00830    | - |

|      |         |    |                        |         |    |
|------|---------|----|------------------------|---------|----|
| Asn  | 0,03423 | ++ | England_Cornewall      | 0.00836 | +  |
| Bas  | 0,03425 | ++ | Italy_Tyrolean         | 0.00842 | +  |
| Fig  | 0,03934 | ++ | Switzerland_Swiss      | 0.00848 | +  |
| SauW | 0,0401  | ++ | Slovenia_Slovenian     | 0.00849 | +  |
| Tln  | 0,04347 | ++ | Macedonia_Macedonian   | 0.00857 | +  |
| Gur  | 0,04836 | ++ | Serbia_Serbian         | 0.00862 | +  |
| Kaz  | 0,05025 | ++ | Morocco_Moroccan       | 0.00864 | +  |
| Mg   | 0,05085 | ++ | Hungary_Anc_Hungarian  | 0.00899 | -  |
| Hui  | 0,05106 | ++ | Syria_Syrian           | 0.00908 | +  |
| Siw  | 0,05367 | ++ | Crete_Cretian          | 0.00908 | +  |
| Lib  | 0,05433 | ++ | Slovakia_E_Slovaki     | 0.00917 | +  |
| Kal  | 0,05686 | ++ | Poland_Polish          | 0.00936 | +  |
| KirK | 0,06553 | ++ | Italy_Abruzzo          | 0.00937 | +  |
| Mon  | 0,07191 | ++ | Russia_Cherkessian     | 0.00944 | +  |
| KirU | 0,07298 | ++ | Iran_Persian           | 0.00949 | +  |
| Khm  | 0,07372 | ++ | Iraq_Iraqi             | 0.00956 | ++ |
| Bar  | 0,07643 | ++ | China_Uzbek_Xinjiang   | 0.00961 | +  |
| Kor  | 0,08466 | ++ | Finland_Finns          | 0.00977 | +  |
| Ger  | 0,0854  | +  | Russia_Abasinian       | 0.00984 | -  |
| Alt  | 0,08614 | ++ | Kabardinian            | 0.00987 | +  |
| Bur  | 0,08835 | ++ | Italia_Lazio           | 0.01015 | +  |
| Mrb  | 0,0986  | -  | China_Uighur_Xinjiang  | 0.01022 | +  |
| Tvn  | 0,10756 | ++ | Bosnia_Bosnian         | 0.01067 | +  |
| Eth  | 0,13809 | ++ | Kazakhstab_Kazak       | 0.01073 | ++ |
| Evn  | 0,16587 | ++ | Spain_Anc_Iberian      | 0.01074 | +  |
| Chk  | 0,32642 | ++ | Russia_Avarian         | 0.01081 | +  |
|      |         |    | Dubai_Arab             | 0.01086 | ++ |
|      |         |    | Russia_Uighur          | 0.01100 | ++ |
|      |         |    | Balkans                | 0.01114 | +  |
|      |         |    | Saudi_Arabia_Saudit    | 0.01125 | +  |
|      |         |    | Albania_Albanian       | 0.01146 | +  |
|      |         |    | Italy_NE_Italian       | 0.01150 | +  |
|      |         |    | France_Morbihan        | 0.01158 | +  |
|      |         |    | Russia_Leginian        | 0.01174 | +  |
|      |         |    | Russia_Darginian       | 0.01192 | +  |
|      |         |    | Greece_Greek           | 0.01199 | +  |
|      |         |    | Austria_Austrian       | 0.01202 | +  |
|      |         |    | Morocco_Berber_Asni    | 0.01205 | +  |
|      |         |    | Norway_Norwegian       | 0.01218 | +  |
|      |         |    | Azerbaijan_Azerbaijain | 0.01234 | +  |
|      |         |    | Turkey_Antalya         | 0.01261 | -  |
|      |         |    | Russia_Telenghit       | 0.01273 | +  |
|      |         |    | Israel_Druze           | 0.01280 | +  |
|      |         |    | Tunisia_Tunisian       | 0.01282 | +  |
|      |         |    | Spain_Andalusian       | 0.01284 | +  |
|      |         |    | France_Corsican        | 0.01314 | +  |
|      |         |    | Sudan_Sudanese         | 0.01318 | +  |
|      |         |    | Russia_Ossetian        | 0.01320 | ++ |
|      |         |    | Russia_Kalmyk          | 0.01340 | ++ |
|      |         |    | Mongolia_Mongol        | 0.01362 | ++ |
|      |         |    | Italy_Anc_Etrusk       | 0.01367 | +  |
|      |         |    | Russia_Kalmyks         | 0.01377 | ++ |
|      |         |    | Iran_Kurd              | 0.01395 | +  |
|      |         |    | Ukrainia_Karelian      | 0.01397 | +  |
|      |         |    | China_Anc_Xinjiang     | 0.01404 | +  |
|      |         |    | Russia_Buryat          | 0.01421 | ++ |
|      |         |    | Kirgisistan_Kirgiz     | 0.01432 | ++ |
|      |         |    | Germany_Tyrolean       | 0.01476 | +  |
|      |         |    | Portugal_Portuguese    | 0.01502 | +  |

|                          |         |    |
|--------------------------|---------|----|
| Ethiopia_Amharic         | 0.01504 | ++ |
| Spain_Spanish            | 0.01504 | +  |
| Adygey                   | 0.01509 | ++ |
| Russia_Khamnigan         | 0.01518 | ++ |
| China_Mongol_Xinjiang    | 0.01528 | +  |
| Kazakstan_Kazak_Xinjiang | 0.01537 | ++ |
| Russia_Karalk            | 0.01555 | +  |
| Sudan_Dinka              | 0.01581 | ++ |
| Russia_Ingushian         | 0.01583 | +  |
| Italy_Sardenian          | 0.01629 | ++ |
| Iran_NE_Iranian          | 0.01633 | +  |
| Russia_Anc_Kurgan        | 0.01642 | +  |
| Algeria_Algerian         | 0.01652 | +  |
| Tenerife_Anc_A           | 0.01689 | ++ |
| France_Var               | 0.01695 | +  |
| Etiopia_Nyangtom         | 0.01767 | ++ |
| Danemark_Danish          | 0.01780 | +  |
| India_Indian             | 0.01783 | ++ |
| China_Hui_Xinjiang       | 0.01868 | +  |
| Yemen_Yemenit            | 0.01901 | ++ |
| Sahari                   | 0.01907 | ++ |
| Tenerife_Anc_B           | 0.01925 | +  |
| Korea_Korean             | 0.02027 | ++ |
| Wale_Wales               | 0.02094 | +  |
| Spain_Galician           | 0.02145 | +  |
| Nubian                   | 0.02167 | ++ |
| Morocco_Berber_Bouhria   | 0.02178 | +  |
| Russia_Karachaian        | 0.02252 | +  |
| Italy_Ladin              | 0.02273 | +  |
| Morocco_Berber_Figuig    | 0.02314 | ++ |
| Hungary_Anc_Cumanian     | 0.02343 | +  |
| Spain_Basque             | 0.02381 | +  |
| Spain_Catalan            | 0.02398 | +  |
| Sudan_Nubian             | 0.02673 | +  |
| Russia_Tuvinian          | 0.02757 | ++ |
| Uzbekistan_Bulharan      | 0.02820 | +  |
| Turkmenistan_Turkmen     | 0.03071 | ++ |
| China_Mongol             | 0.04002 | ++ |
| Kirgisistan_Dungan       | 0.04066 | ++ |
| Italy_Anc_Tuscan         | 0.04239 | +  |
| Morocco_Berber_Siwa      | 0.04722 | ++ |
| Russia_Even              | 0.06131 | ++ |
| Spain_Anc_Basque         | 0.06344 | ++ |
| Russia_Altaian_Kihzi     | 0.07137 | ++ |
| Italy_Anc_Sardenian      | 0.07998 | ++ |
| Russia_Chukchi           | 0.11993 | ++ |
| Lybia_Tuareg             | 0.17679 | ++ |
| Israel_Samaritan         | 0.20506 | ++ |
